# Supplementary material
Source: Royal Society of Chemistry journal article supplement (doi:10.1039/d6cp01812b)
Supplement: d6cp01812b1.pdf [file d6cp01812b1.pdf]

*Supplementary Information for*

**Local Magnetic Moment and Adsorption Energetics as Intrinsic  
Activity Indicators for Bimetallic 2D  $\pi$ -d Conjugated BHT  
Frameworks in Oxygen Evolution Electrocatalysis**

Kuan-Lun Chen<sup>a</sup>, Jing-Yan Wu<sup>a</sup>, Yu-Ting Tai<sup>a</sup>, Yu-Cheng Kuo<sup>b</sup>, Chun-Kai Yeh<sup>a</sup>, Ken  
Sakaushi<sup>\*c</sup>, Hong-Kang Tian<sup>\*abde</sup>

<sup>a</sup> Department of Chemical Engineering, National Cheng Kung University, Tainan 701, Taiwan.

<sup>b</sup> Program on Smart and Sustainable Manufacturing, Academy of Innovative Semiconductor and Sustainable Manufacturing, National Cheng Kung University, Tainan 701, Taiwan.

<sup>c</sup> Research Center for Energy and Environmental Materials, National Institute for Materials Science, Tsukuba, Ibaraki 305-0044, Japan

<sup>d</sup> Center for Resilience and Intelligence on Sustainable Energy Research (RiSER), National Cheng Kung University, Tainan 701, Taiwan

<sup>e</sup> Sustainable Electrochemical Energy Development (SEED) Center, National Taiwan University of Science and Technology, Taipei 106, Taiwan

\*E-mail: hktian@gs.ncku.edu.tw (Hong-Kang Tian)

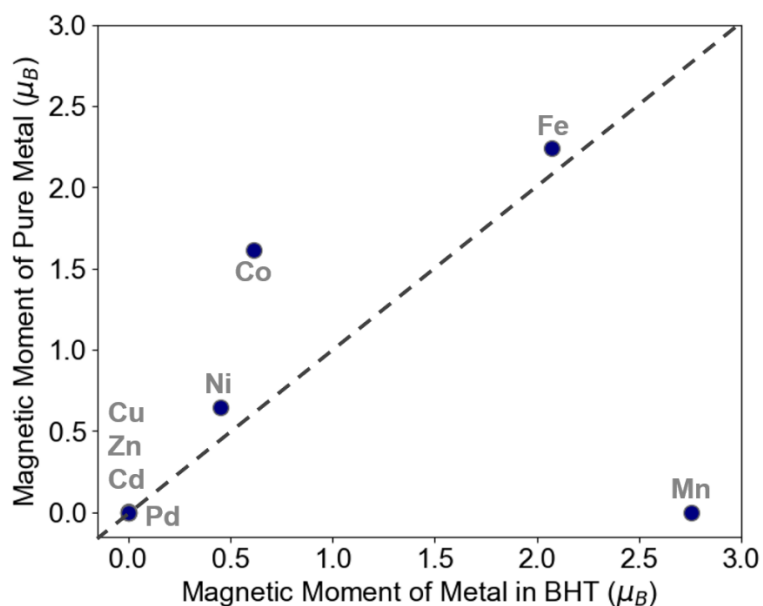

**Fig. S1.** Comparison between the magnetic moments of pure bulk metals and those of the corresponding metal centers in the BHT-based metal–organic framework. The dashed line indicates the  $y=x$  reference, corresponding to no change in magnetic moment after incorporation into the BHT framework.

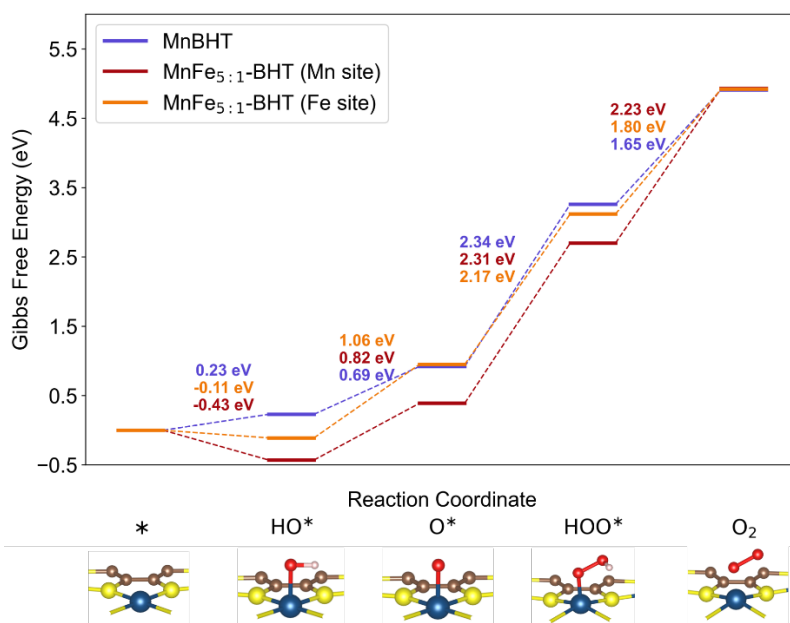

**Fig. S2.** Computational Hydrogen Electrode (CHE)-level Gibbs free energy profiles (neglecting solvation and applied-potential corrections) for qualitative mechanistic comparison. The energy landscape compares the reaction pathways on the Mn-BHT, MnFe<sub>5:1</sub>-BHT Mn site, and MnFe<sub>5:1</sub>-BHT Fe site. The profiles delineate the four intermediate steps of the electrochemical process. The inserted numerical values represent the specific change in Gibbs free energy between consecutive elementary steps.

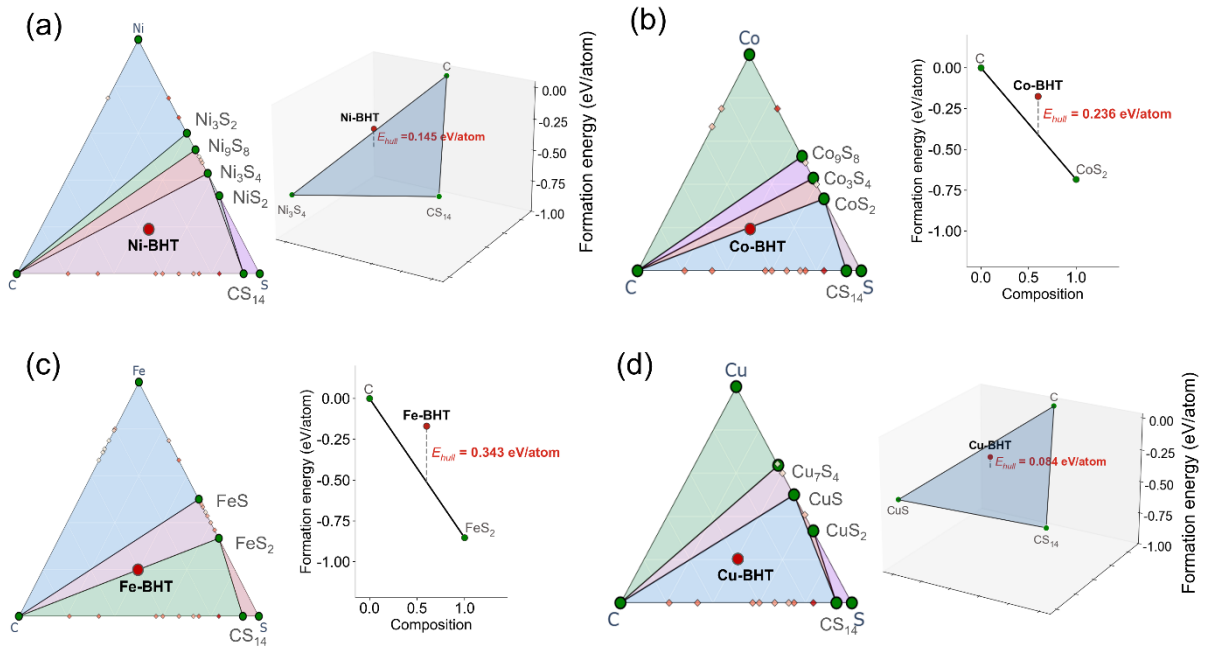

**Fig. S3.** Thermodynamic stability analysis of TM-BHT monolayers. Phase diagrams and convex hull plots for (a) Ni-BHT, (b) Co-BHT, (c) Fe-BHT, (d) Cu-BHT. The red dots represent the TM-BHT structures, and the calculated  $E_{hull}$  values are indicated in red text.

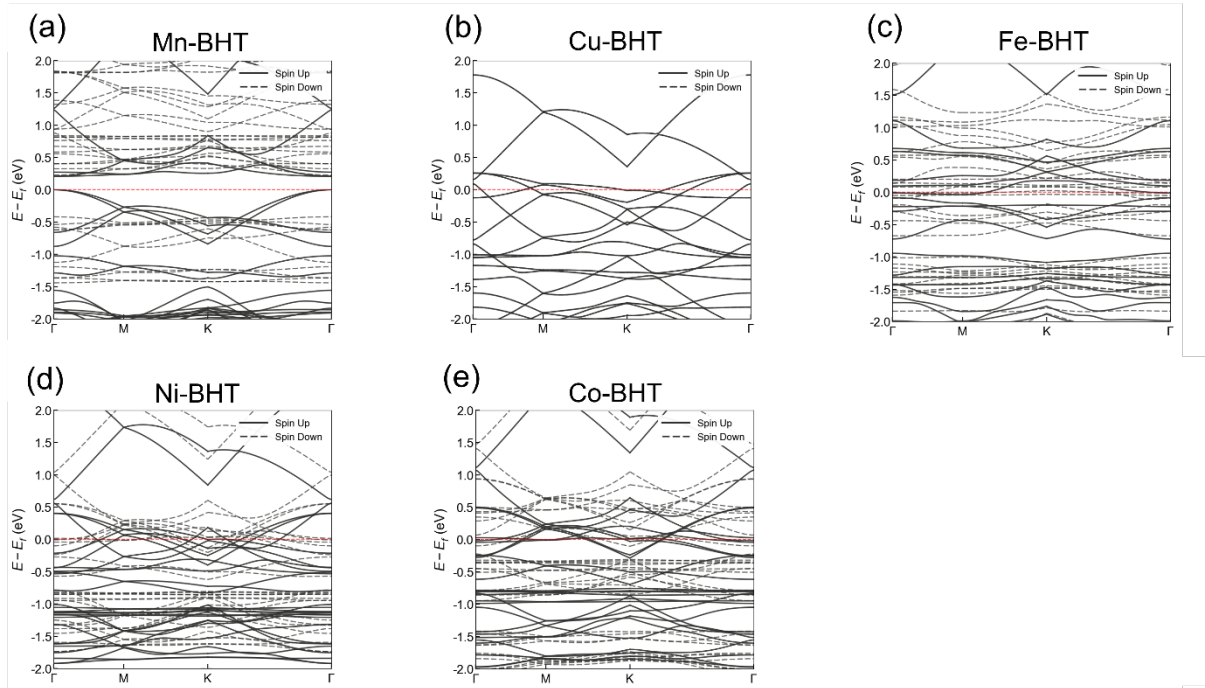

**Fig. S4.** Band structures of TM-BHT monolayers. Calculated spin-polarized band structures for (a) Mn-BHT, (b) Cu-BHT, (c) Fe-BHT, (d) Ni-BHT, (e) Co-BHT along the high-symmetry path  $\Gamma$ -M-K- $\Gamma$ . Solid and dashed lines represent the spin-up and spin-down channels, respectively.

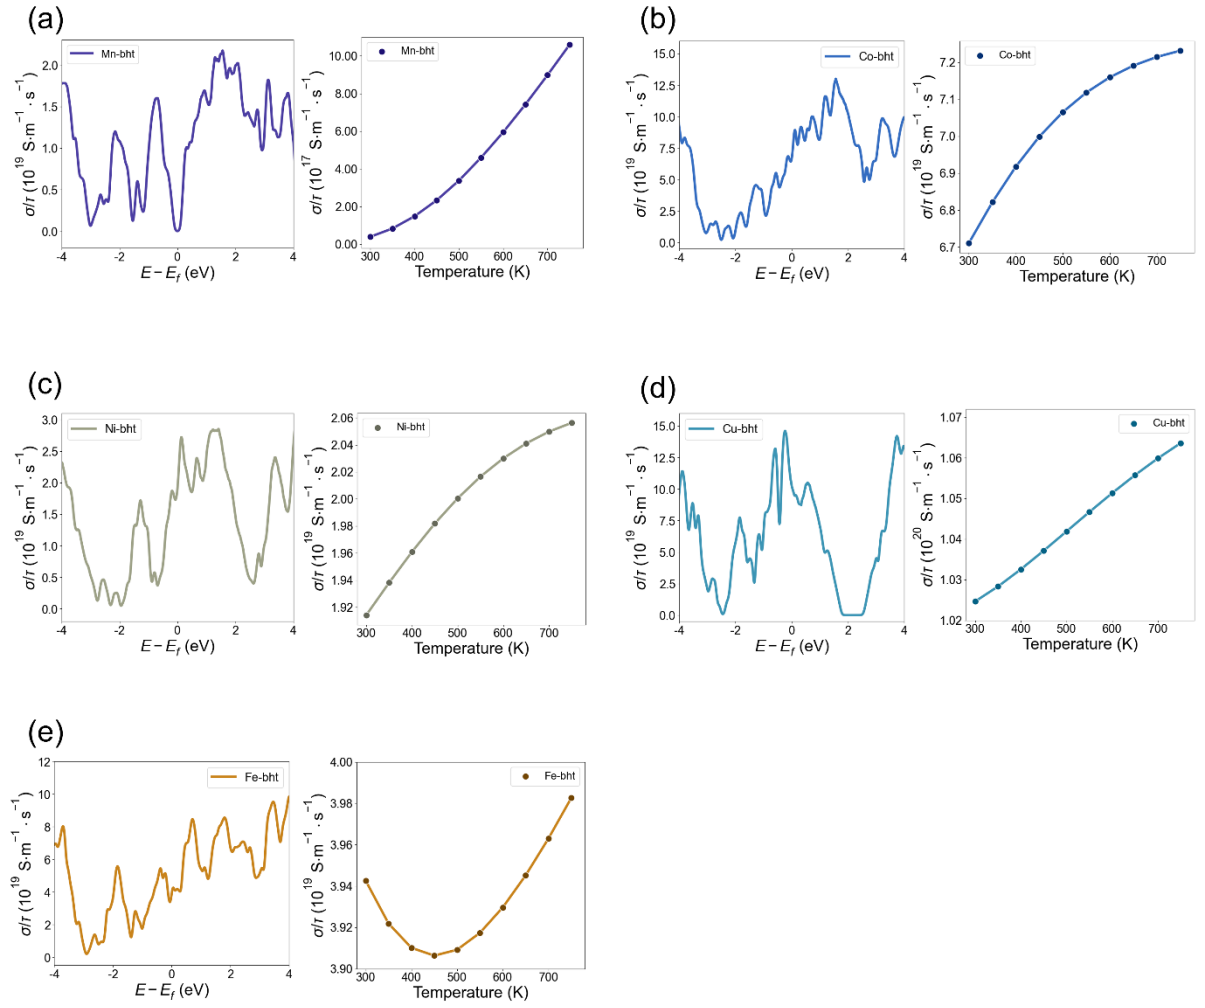

**Fig. S5.** Electronic transport properties of TM-BHT monolayers. Calculated electrical conductivity scaled by relaxation time ( $\sigma/\tau$ ) as a function of (left) chemical potential relative to the Fermi level at 300 K, and (right) temperature for (a) Mn-BHT, (b) Co-BHT, (c) Ni-BHT, (d) Cu-BHT, (e) Fe-BHT.
